# Supplementary material for: Synthesis and properties of novel ammonium-based room-temperature gemini ionic liquids
Source: Royal Society of Chemistry journal article supplement (doi:10.1039/c8ra04127j), 2018-01-01
Supplement: c8ra04127j1.pdf [file c8ra04127j1.pdf]

## Electronic supplementary information

Xuzhao Yang<sup>a,b</sup>, Yun Fang<sup>a,\*</sup>

<sup>a</sup> The Key Laboratory of Food Colloids and Biotechnology, Ministry of Education, School of Chemical and Material Engineering, Jiangnan University, Wuxi 214122, China

<sup>b</sup> Henan Provincial Key Laboratory of Surface and Interface Science, School of Material and Chemical Engineering, Zhengzhou University of Light Industry, Zhengzhou 450002, China

\*Corresponding author: yunfang@126.com (Y. Fang), yangxz@zzuli.edu.cn (X.Z Yang).

**Table S1.** Experimental (exptl) and the literature (lit) values of densities and viscosities for MeCN at temperature  $T = 283.15$  to  $333.15$  K and pressure  $p = 0.1$  MPa<sup>a</sup>

| properties                           | $T/K$  | exptl   | lit                                          |
|--------------------------------------|--------|---------|----------------------------------------------|
| $\rho/(\text{g}\cdot\text{cm}^{-3})$ | 283.15 | 0.79283 | N.A.                                         |
|                                      | 288.15 | 0.78748 | 0.78735 <sup>e</sup> , 0.78765 <sup>f</sup>  |
|                                      | 293.15 | 0.78210 | 0.782308 <sup>d</sup>                        |
|                                      | 298.15 | 0.77670 | 0.77671 <sup>b</sup> , 0.776921 <sup>d</sup> |
|                                      | 303.15 | 0.77127 | 0.77129 <sup>b</sup> , 0.771487 <sup>d</sup> |
|                                      | 308.15 | 0.76581 | 0.76583 <sup>b</sup> , 0.766031 <sup>d</sup> |
|                                      | 313.15 | 0.76032 | 0.76034 <sup>b</sup> , 0.760541 <sup>d</sup> |
|                                      | 318.15 | 0.75479 | 0.75482 <sup>b</sup> , 0.755014 <sup>d</sup> |
|                                      | 323.15 | 0.74922 | 0.74925 <sup>b</sup> , 0.749449 <sup>d</sup> |
|                                      | 328.15 | 0.74362 | 0.743844 <sup>d</sup>                        |
|                                      | 333.15 | 0.73797 | 0.738212 <sup>d</sup>                        |
| $\eta/(\text{mPa}\cdot\text{s})$     | 283.15 | 0.4012  | N.A.                                         |
|                                      | 288.15 | 0.3819  | 0.3770 <sup>e</sup> , 0.3760 <sup>f</sup>    |
|                                      | 293.15 | 0.3641  | 0.364 <sup>d</sup>                           |
|                                      | 298.15 | 0.3479  | 0.3417 <sup>e</sup> , 0.346 <sup>d</sup>     |
|                                      | 303.15 | 0.3332  | 0.3280 <sup>e</sup> , 0.331 <sup>d</sup>     |
|                                      | 308.15 | 0.3196  | 0.3129 <sup>e</sup> , 0.316 <sup>d</sup>     |
|                                      | 313.15 | 0.3071  | 0.3009 <sup>e</sup> , 0.304 <sup>d</sup>     |
|                                      | 318.15 | 0.2956  | 0.2899 <sup>e</sup> , 0.291 <sup>d</sup>     |
|                                      | 323.15 | 0.2849  | 0.280 <sup>d</sup>                           |
|                                      | 328.15 | 0.2750  | 0.269 <sup>d</sup>                           |
|                                      | 333.15 | 0.2658  | 0.259 <sup>d</sup>                           |

<sup>a</sup> Standard uncertainties  $u$  are  $u(T) = 0.01$  K,  $u(p) = 0.20$  kPa,  $u(\rho) = 0.000005$  g·cm<sup>-3</sup>,  $u(\eta) = 0.000001$  mPa for the experimental data. N.A. = not available. <sup>b</sup> From ref [21]. <sup>c</sup> From ref [22]. <sup>d</sup> From ref [23]. <sup>e</sup> From ref [24]. <sup>f</sup> From ref [25].

**Table S2.** Thermal expansion coefficient  $\alpha$  of the three binary mixtures containing GILs at various temperatures <sup>a</sup>

| $x_1$                                                                         | $10^4 \alpha / \text{K}^{-1}$ |        |        |        |        |        |        |        |        |        |        |
|-------------------------------------------------------------------------------|-------------------------------|--------|--------|--------|--------|--------|--------|--------|--------|--------|--------|
|                                                                               | 283.15                        | 288.15 | 293.15 | 298.15 | 303.15 | 308.15 | 313.15 | 318.15 | 323.15 | 328.15 | 333.15 |
|                                                                               | K                             | K      | K      | K      | K      | K      | K      | K      | K      | K      | K      |
| $x_1 ([\text{N}_{111}\text{C}_3\text{Py}][\text{DCA}]_2) + x_2(\text{MeCN})$  |                               |        |        |        |        |        |        |        |        |        |        |
| 0.0000                                                                        | 13.874                        | 13.969 | 14.065 | 14.162 | 14.262 | 14.364 | 14.468 | 14.574 | 14.682 | 14.793 | 14.906 |
| 0.0999                                                                        | 8.347                         | 8.381  | 8.415  | 8.450  | 8.486  | 8.522  | 8.559  | 8.595  | 8.631  | 8.674  | 8.710  |
| 0.1999                                                                        | 6.922                         | 6.947  | 6.971  | 6.996  | 7.021  | 7.045  | 7.070  | 7.095  | 7.120  | 7.145  | 7.171  |
| 0.2998                                                                        | 6.079                         | 6.098  | 6.117  | 6.136  | 6.155  | 6.174  | 6.193  | 6.212  | 6.232  | 6.251  | 6.270  |
| 0.3997                                                                        | 5.725                         | 5.742  | 5.758  | 5.774  | 5.791  | 5.808  | 5.825  | 5.842  | 5.860  | 5.877  | 5.893  |
| 0.4999                                                                        | 5.421                         | 5.436  | 5.451  | 5.467  | 5.482  | 5.497  | 5.512  | 5.527  | 5.542  | 5.557  | 5.572  |
| 0.6002                                                                        | 5.309                         | 5.323  | 5.337  | 5.352  | 5.367  | 5.381  | 5.396  | 5.410  | 5.424  | 5.439  | 5.453  |
| 0.7001                                                                        | 5.206                         | 5.220  | 5.234  | 5.248  | 5.262  | 5.276  | 5.290  | 5.304  | 5.318  | 5.332  | 5.345  |
| 0.7998                                                                        | 5.103                         | 5.116  | 5.129  | 5.142  | 5.156  | 5.169  | 5.183  | 5.196  | 5.210  | 5.223  | 5.236  |
| 0.8997                                                                        | 4.975                         | 4.987  | 5.000  | 5.013  | 5.026  | 5.038  | 5.051  | 5.064  | 5.076  | 5.089  | 5.101  |
| 1.0000                                                                        | 4.965                         | 4.978  | 4.991  | 5.004  | 5.016  | 5.029  | 5.042  | 5.054  | 5.067  | 5.079  | 5.092  |
| $x_1 ([\text{N}_{111}\text{C}_3\text{MPi}][\text{DCA}]_2) + x_2(\text{MeCN})$ |                               |        |        |        |        |        |        |        |        |        |        |
| 0.0000                                                                        | 13.874                        | 13.969 | 14.065 | 14.162 | 14.262 | 14.364 | 14.468 | 14.574 | 14.682 | 14.793 | 14.906 |
| 0.0999                                                                        | 8.508                         | 8.544  | 8.581  | 8.618  | 8.655  | 8.693  | 8.731  | 8.769  | 8.807  | 8.846  | 8.886  |
| 0.2001                                                                        | 6.793                         | 6.816  | 6.840  | 6.864  | 6.888  | 6.911  | 6.935  | 6.959  | 6.983  | 7.008  | 7.032  |
| 0.3001                                                                        | 6.052                         | 6.070  | 6.089  | 6.108  | 6.127  | 6.146  | 6.164  | 6.183  | 6.202  | 6.222  | 6.241  |
| 0.3998                                                                        | 5.648                         | 5.664  | 5.682  | 5.698  | 5.714  | 5.730  | 5.747  | 5.763  | 5.779  | 5.796  | 5.812  |
| 0.5002                                                                        | 5.504                         | 5.520  | 5.535  | 5.551  | 5.566  | 5.582  | 5.597  | 5.613  | 5.628  | 5.644  | 5.660  |
| 0.6000                                                                        | 5.270                         | 5.284  | 5.299  | 5.313  | 5.327  | 5.341  | 5.356  | 5.369  | 5.384  | 5.399  | 5.414  |
| 0.7001                                                                        | 5.134                         | 5.148  | 5.162  | 5.175  | 5.189  | 5.202  | 5.216  | 5.229  | 5.243  | 5.256  | 5.270  |
| 0.7996                                                                        | 5.014                         | 5.028  | 5.041  | 5.054  | 5.067  | 5.080  | 5.093  | 5.106  | 5.119  | 5.131  | 5.143  |
| 0.8998                                                                        | 4.985                         | 4.998  | 5.011  | 5.024  | 5.037  | 5.049  | 5.062  | 5.075  | 5.087  | 5.100  | 5.113  |
| 1.0000                                                                        | 4.919                         | 4.932  | 4.944  | 4.957  | 4.969  | 4.982  | 4.994  | 5.006  | 5.019  | 5.031  | 5.043  |

<sup>a</sup> $x_1$  is the mole fraction of GIL. <sup>a</sup>Uncertainties are  $u(T) = 0.01 \text{ K}$ ,  $u(x) = 0.0001$ ,  $u(\alpha) = 0.001 \text{ K}^{-1}$ .

**Table S3.** Coefficients of Redlich–Kister equation and corresponding standard deviations ( $\sigma$ ) and correlation coefficients ( $R^2$ ) for  $[\text{N}_{111}\text{C}_3\text{MIM}][\text{DCA}]_2$  (1) + MeCN (2) from  $T = (283.15 \text{ to } 333.15) \text{ K}$ .

| $T/\text{K}$                                  | $A_0$       | $A_1$       | $A_2$       | $A_3$       | $\sigma$ |
|-----------------------------------------------|-------------|-------------|-------------|-------------|----------|
| $V_m^E / (\text{cm}^3 \cdot \text{mol}^{-1})$ |             |             |             |             |          |
| 283.15                                        | -7.30308    | 1.01692     | 2.0189      | 1.33121     | 0.05541  |
| 288.15                                        | -7.61950    | 0.75737     | 1.42125     | 1.82388     | 0.05089  |
| 293.15                                        | -7.92794    | 0.99865     | 1.12807     | 1.72594     | 0.04669  |
| 298.15                                        | -8.07166    | 1.12097     | 0.34822     | 1.72055     | 0.03347  |
| 303.15                                        | -8.37665    | 0.97592     | -0.00428    | 2.57979     | 0.03821  |
| 308.15                                        | -8.69993    | 1.15793     | -0.47498    | 2.77323     | 0.03347  |
| 313.15                                        | -8.95838    | 1.16226     | -1.30925    | 3.41117     | 0.03834  |
| 318.15                                        | -9.32554    | 0.88771     | -1.60741    | 4.49203     | 0.04290  |
| 323.15                                        | -9.70658    | 0.77373     | -1.93430    | 5.35450     | 0.05070  |
| 328.15                                        | -10.23874   | 1.18425     | -2.18738    | 5.40632     | 0.05441  |
| 333.15                                        | -10.78179   | 1.40131     | -2.81326    | 6.10666     | 0.05612  |
| $\Delta\eta / (\text{mPa} \cdot \text{s})$    |             |             |             |             |          |
| 283.15                                        | -8738.48659 | -6746.71981 | -8736.08168 | -7612.98358 | 35.15052 |
| 288.15                                        | -4619.62073 | -3370.48445 | -4350.30445 | -3819.19467 | 17.90744 |
| 293.15                                        | -2597.87047 | -1783.36552 | -2304.46679 | -2019.20748 | 9.14395  |
| 298.15                                        | -1551.42085 | -999.45374  | -1322.14071 | -1162.24422 | 5.20947  |
| 303.15                                        | -971.00488  | -590.64000  | -795.12754  | -684.85392  | 3.32217  |
| 308.15                                        | -631.7485   | -362.40503  | -497.82265  | -417.66399  | 2.43037  |
| 313.15                                        | -424.77456  | -231.86942  | -323.94345  | -257.6911   | 2.09380  |
| 318.15                                        | -294.85924  | -153.08921  | -215.26529  | -155.94176  | 1.91847  |
| 323.15                                        | -208.0082   | -99.59203   | -150.59512  | -106.61077  | 1.73494  |
| 328.15                                        | -148.82555  | -61.22246   | -109.57642  | -79.20319   | 1.67678  |
| 333.15                                        | -108.78446  | -39.98549   | -78.97421   | -53.07332   | 1.49058  |

**Table S4.** Coefficients of Redlich–Kister equation and corresponding standard deviations ( $\sigma$ ) and correlation coefficients $(R^2)$  for  $[\text{N}_{111}\text{C}_3\text{MIM}][\text{DCA}]_2$  (1) + MeCN (2) from  $T = (283.15 \text{ to } 333.15) \text{ K}$ 

| $T/\text{K}$                                  | $A_0$       | $A_1$       | $A_2$       | $A_3$       | $\sigma$ |
|-----------------------------------------------|-------------|-------------|-------------|-------------|----------|
| $V_m^E / (\text{cm}^3 \cdot \text{mol}^{-1})$ |             |             |             |             |          |
| 283.15                                        | -7.30308    | 1.01692     | 2.0189      | 1.33121     | 0.05541  |
| 288.15                                        | -7.61950    | 0.75737     | 1.42125     | 1.82388     | 0.05089  |
| 293.15                                        | -7.92794    | 0.99865     | 1.12807     | 1.72594     | 0.04669  |
| 298.15                                        | -8.07166    | 1.12097     | 0.34822     | 1.72055     | 0.03347  |
| 303.15                                        | -8.37665    | 0.97592     | -0.00428    | 2.57979     | 0.03821  |
| 308.15                                        | -8.69993    | 1.15793     | -0.47498    | 2.77323     | 0.03347  |
| 313.15                                        | -8.95838    | 1.16226     | -1.30925    | 3.41117     | 0.03834  |
| 318.15                                        | -9.32554    | 0.88771     | -1.60741    | 4.49203     | 0.04290  |
| 323.15                                        | -9.70658    | 0.77373     | -1.93430    | 5.35450     | 0.05070  |
| 328.15                                        | -10.23874   | 1.18425     | -2.18738    | 5.40632     | 0.05441  |
| 333.15                                        | -10.78179   | 1.40131     | -2.81326    | 6.10666     | 0.05612  |
| $\Delta\eta / (\text{mPa} \cdot \text{s})$    |             |             |             |             |          |
| 283.15                                        | -8738.48659 | -6746.71981 | -8736.08168 | -7612.98358 | 35.15052 |
| 288.15                                        | -4619.62073 | -3370.48445 | -4350.30445 | -3819.19467 | 17.90744 |
| 293.15                                        | -2597.87047 | -1783.36552 | -2304.46679 | -2019.20748 | 9.14395  |
| 298.15                                        | -1551.42085 | -999.45374  | -1322.14071 | -1162.24422 | 5.20947  |
| 303.15                                        | -971.00488  | -590.64000  | -795.12754  | -684.85392  | 3.32217  |
| 308.15                                        | -631.7485   | -362.40503  | -497.82265  | -417.66399  | 2.43037  |
| 313.15                                        | -424.77456  | -231.86942  | -323.94345  | -257.6911   | 2.09380  |
| 318.15                                        | -294.85924  | -153.08921  | -215.26529  | -155.94176  | 1.91847  |
| 323.15                                        | -208.0082   | -99.59203   | -150.59512  | -106.61077  | 1.73494  |
| 328.15                                        | -148.82555  | -61.22246   | -109.57642  | -79.20319   | 1.67678  |
| 333.15                                        | -108.78446  | -39.98549   | -78.97421   | -53.07332   | 1.49058  |

**Table S5.** Fitted parameters and correlation coefficients ( $R^2$ ) of the various expressions for the viscosity of pure GILs at different temperatures

| Equation                                                | $A$      | $B$         | $T_0$  | $R^2$  |
|---------------------------------------------------------|----------|-------------|--------|--------|
| [N <sub>111</sub> C <sub>3</sub> Py][DCA] <sub>2</sub>  |          |             |        |        |
| VTF                                                     | 0.49208  | -650.56645  | 215.66 | 1.0000 |
| mVTF                                                    | 0.02216  | -680.51589  | 214.53 | 1.0000 |
| Litovitz                                                | 0.03624  | -2.31022E9  |        | 0.9988 |
| Ghatee                                                  | -0.87846 | 3.340E-3    |        | 0.9998 |
| [N <sub>111</sub> C <sub>3</sub> MPi][DCA] <sub>2</sub> |          |             |        |        |
| VTF                                                     | 0.17038  | -1052.17455 | 189.81 | 1.0000 |
| mVTF                                                    | 0.00699  | -1107.16552 | 188.05 | 1.0000 |
| Litovitz                                                | 0.35688  | -1.98037E9  |        | 0.9997 |
| Ghatee                                                  | -0.69325 | 2.640 E-3   |        | 0.9993 |

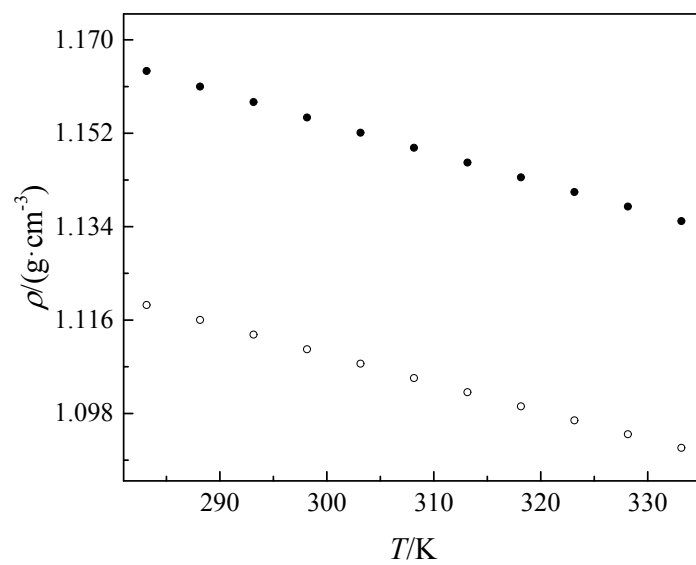

**Figure S1.** Density ( $\rho$ ) as a function of temperature ( $T$ ) for pure GILs: (●)  $[\text{N}_{111}\text{C}_3\text{Py}][\text{DCA}]_2$ ; (○)  $[\text{N}_{111}\text{C}_3\text{MPi}][\text{DCA}]_2$ .

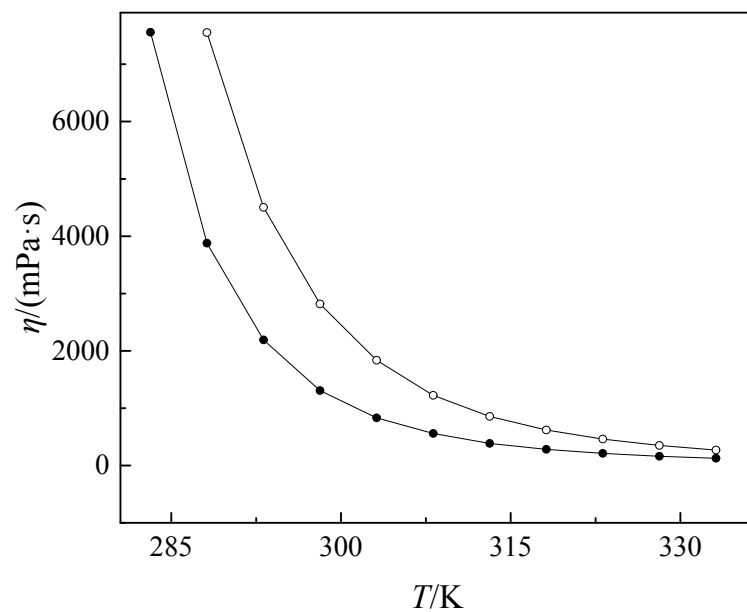

**Figure S2.** Temperature dependence of viscosity of pure GILs: (●) [N<sub>111</sub>C<sub>3</sub>Py][DCA]<sub>2</sub>; (○) [N<sub>111</sub>C<sub>3</sub>MPi][DCA]<sub>2</sub>.
